# Supplementary material
Source: PubMed Central journal article supplement (PMC2937084)
Supplement: NIHMS203798-supplement-Supp_Fig_s1.pdf [file NIHMS203798-supplement-Supp_Fig_s1.pdf]

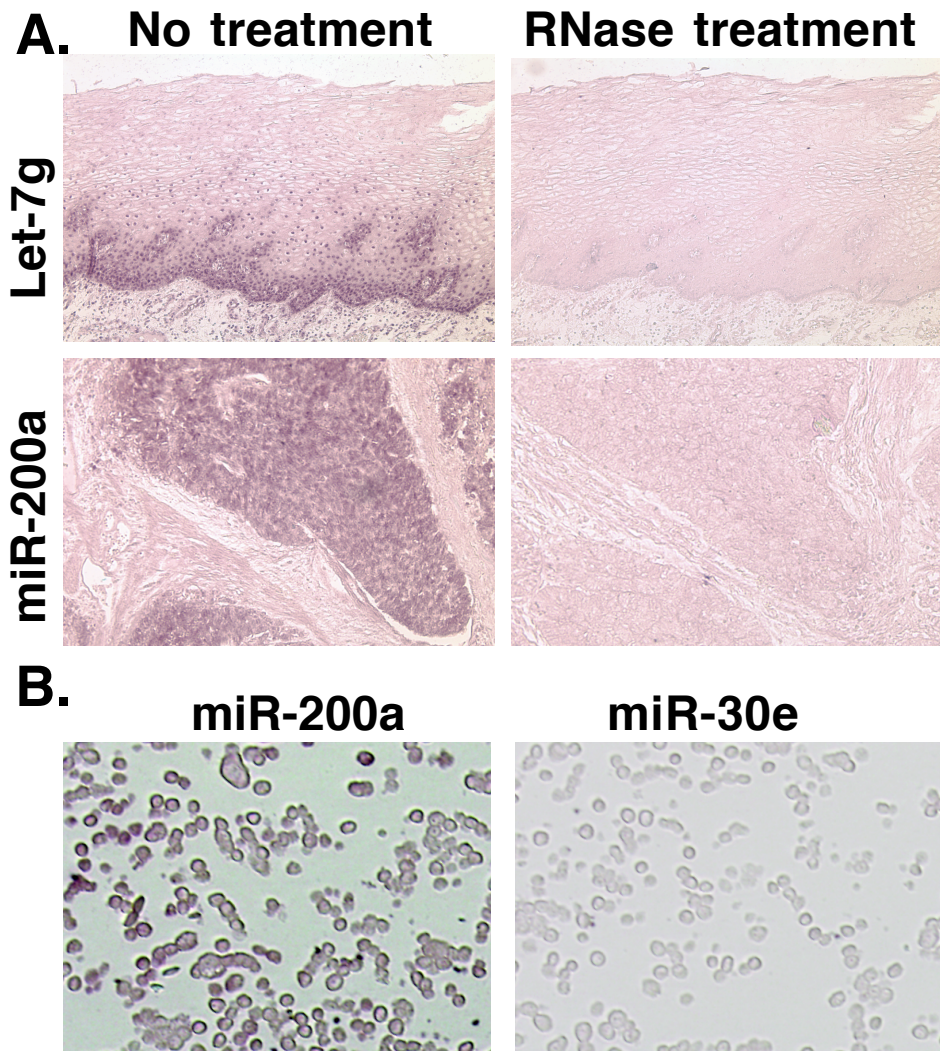

**Supplemental Figure 1.** In situ hybridization detection of miRNA expression in esophageal tissue specimens and tumor cell lines. **A,** Compared to the untreated normal and cancerous esophageal tissues, RNase A pretreatment of the paraffin section serves as a negative control. **B,** Esophageal cancer TE-3 cells expressed miR-200a using northern blot analysis and in situ hybridization also showed positive staining of miR-220a in these cells, whereas TE-3 cells didn't express miR-30e and in situ hybridization also showed negative staining of miR-30e.
